# Supplementary material
Source: Research Square preprint supplement (doi:10.21203/rs.3.rs-9597279/v1)
Supplement: Supplementary file 1 [file 48501fe772a32e4ed8700644.docx]

Supplementary File

Contents:

- Page 2= **Supplementary Table 1:** Demographics and sleep study parameters of cohort included within this study as compared to those who were lost to follow-up.
- Page 3= **Supplementary Table 2:** Demographics of study cohort
- Page 4= **Supplementary Table 3:** Additional imaging data parameters at baseline and follow-up for the (compliant)_NPPV dataset.
- Page 5= **Supplementary Table 4:** Number of patients above various threshold values for magnitude in percentage changes in facial convexity angle, categorised by craniofacial status and OSA severity at baseline.
- Page 6= **Supplementary Figure 1:** Correlation graphs for the percent change in facial angle of convexity with duration between images, and the age at follow-up.

**Supplementary Table 1:** Demographics and sleep study parameters of cohort included within this study as compared to those who were lost to follow-up or did not have a follow-up 3D image from our 1st study*.

|  | **Included cohort (n-18)** | **Cohort excluded* (n=95)** | |
| --- | --- | --- | --- |
|  | *Mean ± SD* | | *Mean ± SD* | | *P-value* |
| *Age at time of photo (years)* | 3.5 ± 3.9 | | 4.5 ± 4.8 | | 0.39 |
| *Weight (kg)* | 15.6 ± 12.0 | | 21.9 ± 22.3 | | 0.24 |
| *Height (cm)* | 86.5 ± 32.5 | | 96.1 ± 38.1 | | 0.32 |
| *AHI* | 23.5 ± 24.8 | | 22.4 ± 23.8 | | 0.86 |
| *OAHI* | 13.6 ± 18.4 | | 17.1 ± 18.9 | | 0.47 |
| *Baseline SpO2(%)* | 96.3 ± 2.0 | | 95.9 ± 2.9 | | 0.47 |
| *Min SpO2(%)* | 84.1 ± 8.6 | | 84.7 ± 11.3 | | 0.80 |
| *Baseline TcCO2(%)* | 47.5 ± 6.2 | | 45.4 ± 5.0 | | 0.13 |
| *Max TcCO2(%)* | 54.1 ± 8.0 | | 52.5 ± 9.5 | | 0.49 |
| *Mean facial convexity angle (°)* | 167.9 ± 6.4 | | 165.1 ± 7.3 | | 0.13 |

|  | **Included cohort herein** | | **Cohort excluded*** | |  |
| --- | --- | --- | --- | --- | --- |
| **Category** | **Frequency (n)** | **Percentage (%)** | **Frequency (n)** | **Percentage (%)** | **P value#** |
| **Sex** | | |  |  |  |
| *Male* | 10 | 56 | 55 | 58 | 0.85 |
| *Female* | 8 | 44 | 40 | 42 |  |
| **Age at 3D imaging** **at baseline** | | |  |  |  |
| *0-<6 months* | 7 | 39 | 28 | 29 | 0.77 |
| *6-<12 months* | 2 | 11 | 9 | 9 |  |
| *1-<6 years* | 4 | 22 | 25 | 26 |  |
| *6-<12 years* | 5 | 28 | 25 | 26 |  |
| *>12-18 years* | 0 | 0 | 8 | 8 |  |
| **OSA Severity at baseline** | | |  |  |  |
| *OAHI negative* | 2 | 11 | 10 | 11 | 0.88 |
| *Mild* | 3 | 17 | 19 | 20 |  |
| *Moderate* | 4 | 22 | 14 | 15 |  |
| *Severe* | 9 | 50 | 52 | 55 |  |
| **Craniofacial Status** | | |  |  |  |
| *No craniofacial Abnormality* | 11 | 61 | 78 | 82 | 0.30 |
| *Craniofacial Abnormality* | 7 | 39 | 17 | 18 |  |

* Cohort of children who were in our first study (*J Clin Sleep Med. 2023;19(2):275-282* [*https://link.springer.com/article/10.5664/jcsm.10312*](https://link.springer.com/article/10.5664/jcsm.10312) *) but did not have a follow-up 3D imaging and as such, were excluded from this study.*

# Pearson Chi-Square

AHI = apnoea hypopnea index, OAHI = obstructive apnoea hypopnea index, SpO2 = oxyhaemoglobin saturation, TcCO2= transcutaneous carbon dioxide, SD= standard deviation.

**Supplementary Table 2:** Demographics of study cohort

| **Category** | **Frequency (n)** | **Percentage (%)** |
| --- | --- | --- |
| **Sex** | | |
| *Male* | 10 | 56 |
| *Female* | 8 | 44 |
| **Age at 3D imaging** **at baseline** | | |
| *0-<6 months* | 7 | 39 |
| *6-<12 months* | 2 | 11 |
| *1-<6 years* | 4 | 22 |
| *6-<12 years* | 5 | 28 |
| **OSA Severity at baseline** | | |
| *OAHI negative* | 2 | 11 |
| *Mild* | 3 | 17 |
| *Moderate* | 4 | 22 |
| *Severe* | 9 | 50 |
| **Ethnicity** | | |
| *Caucasian* | 10 | 56 |
| *Asian* | 5 | 28 |
| *Middle Eastern or African* | 3 | 17 |
| **Craniofacial Status** | | |
| *No craniofacial Abnormality* | 11 | 61 |
| *Craniofacial Abnormality* | 7 | 39 |
| **NPPV use** | | |
| *CPAP* | 12 | 67 |
| *BIPAP* | 3 | 17 |
| *Not used* | 3 | 17 |
| **Compliance status of NPPV use** | | |
| *Compliant* | 13 | 72 |
| *Non-Compliant (including those who did not use NPPV)* | 5 | 28 |

**Supplementary Table 3:** Additional imaging data parameters at baseline and follow-up for the (compliant)_NPPV dataset.

|  | **Baseline** | | **Follow-up** | | **Difference** | | **95% Confidence Interval** | |  |
| --- | --- | --- | --- | --- | --- | --- | --- | --- | --- |
|  | *Mean ± SD* | *Median* | *Mean ± SD* | *Median* | *Mean* | *Median* | *Lower bound* | *Upper bound* | *P value* |
| **Nasion to Menton (mm)** | | | | | | | | | |
| *All cohort (n=10)* | 83.3 ± 17.3 | 84.7 | 94.2 ± 13.0 | 89.4 | 9.0 ± 8.3 | 8.7 | 1.6 | 16.4 | 0.01 |
| *Non-craniofacial subset (n=6)* | 82.1 ±19.6 | 78.2 | 96.3 ± 15.0 | 89.4 | 11.0 ± 8.5 | 10.5 | 1.6 | 22.4 | 0.06 |
| *Craniofacial subset (n=4)* | 85.1 ± 15.8 | 86.5 | 91.6 ± 11.7 | 91.2 | 6.4 ± 8.4 | 4.7 |  |  |  |
| **Nasion to Subnasale (mm)** | | | | | | | | | |
| *All cohort (n=10)* | 38.9 ± 7.9 | 38.8 | 44.2 ± 6.5 | 42.3 | 4.6 ± 7.1 | 5.7 | -1.2 | 11.0 | 0.16 |
| *Non-craniofacial subset (n=6)* | 37.8 ± 9.3 | 35.4 | 44.6 ± 6.3 | 42.3 | 5.8 ± 7.3 | 6.4 | -1.5 | 16.2 | 0.31 |
| *Craniofacial subset (n=4)* | 40.6 ± 6.1 | 41.0 | 43.8 ± 7.7 | 40.7 | 3.2 ± 7.5 | 2.7 |  |  |  |
| **Subnasale to Menton (mm)** | | | | | | | | | |
| *All cohort (n=9)* | 45.9 ± 11.2 | 45.9 | 53.1 ± 9.3 | 53.1 | 6.1 ± 5.8 | 6.1 | 1.7 | 11.3 | 0.02 |
| *Non-craniofacial subset (n=5)* | 47.0 ± 13.1 | 44.3 | 53.7 ± 11.3 | 53.6 | 4.5 ± 3.8 | 4.6 | -1.3 | 8.2 | 0.13 |
| *Craniofacial subset (n=4)* | 44.2 ± 9.4 | 45.9 | 52.4 ± 7.8 | 51.2 | 8.2 ± 7.7 | 7.7 |  |  |  |
| **Nose Base Width (mm)** | | | | | | | | | |
| *All cohort (n=9)* | 17.2 ± 3.1 | 16.5 | 20.6 ± 3.8 | 19.6 | 3.0 ± 3.5 | 2.9 | 0.6 | 6.1 | 0.02 |
| *Non-craniofacial subset (n=5)* | 16.8 ± 3.5 | 15.7 | 21.1 ± 4.7 | 20.4 | 3.7 ± 4.5 | 1.3 | -0.1 | 10.9 | 0.13 |
| *Craniofacial subset (n=4)* | 17.8 ± 2.8 | 17.5 | 20.0 ± 3.0 | 19.0 | 2.2 ± 2.0 | 3.0 |  |  |  |

**Supplementary Table 4:** Number of patients above various threshold values for magnitude in percentage changes in facial convexity angle, categorised by craniofacial status and OSA severity at baseline.

|  | **Patient exceeding threshold *(%)*** | | |
| --- | --- | --- | --- |
| **Threshold*** | **>1%** | **>3.5%** | **>5%** |
| **Craniofacial Status** | | | |
| *Entire Cohort* | | | |
| *NPPV (n=13)* | 85 | 46 | 31 |
| *NC control (n=5)* | 60 | 0 | 0 |
| *No Craniofacial Abnormality* | | | |
| *NPPV (n=9)* | 89 | 67 | 44 |
| *NC control (n=2)* | 100 | 0 | 0 |
| *Craniofacial Abnormality* | | | |
| *NPPV (n=4)* | 75 | 25 | 0 |
| *NC control (n=3)* | 67 | 0 |  |
| **OSA Severity at Baseline** | | | |
| *Entire Cohort (n=18)* | | | |
| Mild (n=4) | 100 | 25 | 25 |
| Moderate (n=5) | 80 | 20 | 20 |
| Severe (n=9) | 67 | 56 | 22 |
| *NPPV (n=13)* | | | |
| Mild (n=2) | 100 | 50 | 50 |
| Moderate (n=4) | 75 | 25 | 25 |
| Severe (n=7) | 86 | 71 | 29 |
| *NC Control (n=5)* | | | |
| Mild (n=2) | 100 | 0 | 0 |
| Moderate (n=1) | 100 | 0 | 0 |
| Severe (n=2) | 0 | 0 | 0 |

*Includes negative percentage change


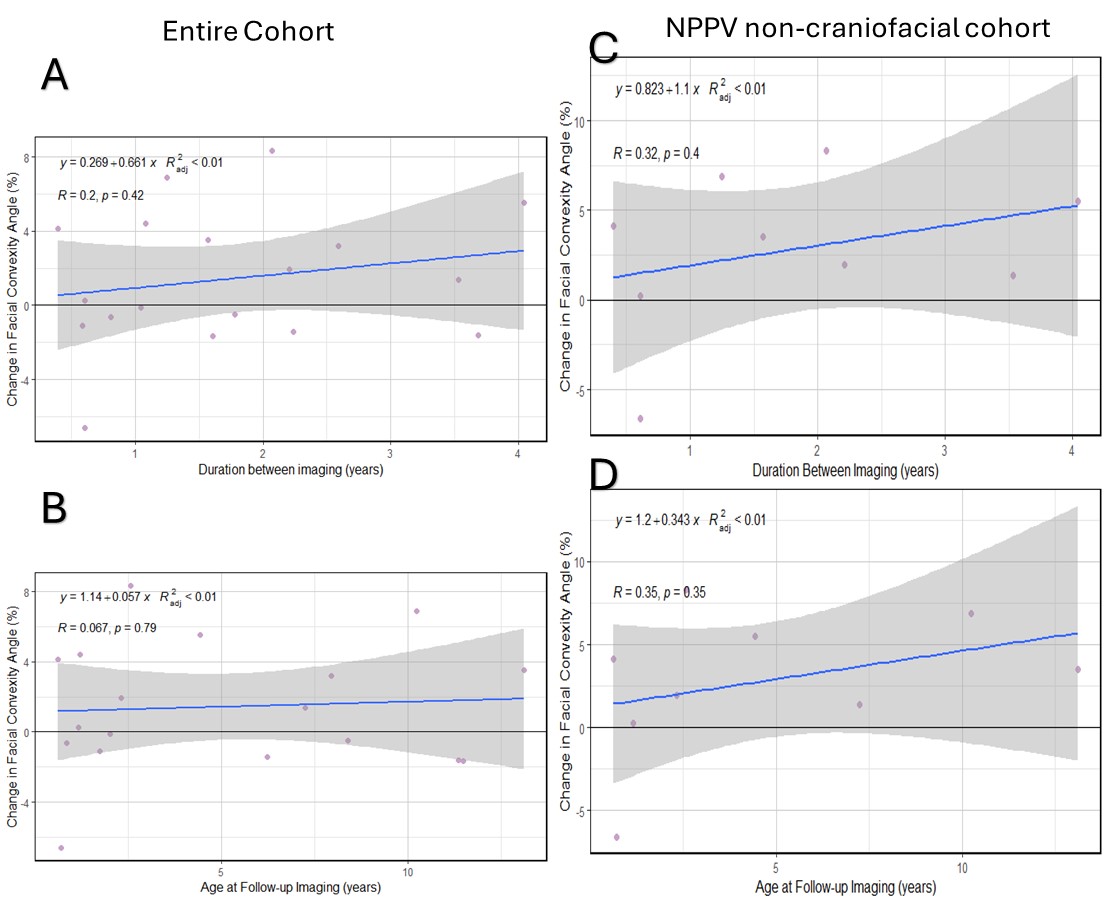


**Supplementary Figure 1:** Correlation graphs for the percent change in facial angle of convexity with (A & C) duration between imaging (photos 2 and 1), and (B & D) the age at follow-up, for (A&B) entire cohort regardless of NPPV use and craniofacial status (n=18), and (C&D) NPPV non-craniofacial cohort (n=9).
